# Supplementary material
Source: PubMed Central journal article supplement (PMC4674298)
Supplement: NIHMS728229-supplement-1.pdf [file NIHMS728229-supplement-1.pdf]

**Supplemental Table.** Concordance of Immunohistochemical Staining of PD-L1 Expression (130021 vs SP142 antibody) in 19 Renal Cell Carcinomas With Sarcomatoid Differentiation

| Sample | Anti-PD-L1 (Clone 130021) |     |            | Anti-PD-L1 (Clone SP142) |     |            |
|--------|---------------------------|-----|------------|--------------------------|-----|------------|
|        | Intensity                 | %   | Result     | Intensity                | %   | Result     |
| 1      | 2                         | 70  | POS        | 2                        | 5   | POS        |
| 2      | 1                         | 20  | NEG        | 2                        | 1   | NEG        |
| 3      | 2                         | 100 | <b>POS</b> | 2                        | 2   | <b>NEG</b> |
| 4      | 1                         | 60  | NEG        | 1                        | 2   | NEG        |
| 5      | 2                         | 25  | POS        | 2                        | 10  | POS        |
| 6      | 1                         | 60  | NEG        | 2                        | 2   | NEG        |
| 7      | 1                         | 10  | NEG        | 0                        | 100 | NEG        |
| 8      | 1                         | 90  | NEG        | 1                        | 1   | NEG        |
| 9      | 2                         | 10  | POS        | 2                        | 90  | POS        |
| 10     | 1                         | 20  | NEG        | 1                        | 1   | NEG        |
| 11     | 1                         | 2   | NEG        | 1                        | 1   | NEG        |
| 12     | 0                         | 100 | NEG        | 0                        | 100 | NEG        |
| 13     | 2                         | 80  | POS        | 2                        | 100 | POS        |
| 14     | 2                         | 5   | POS        | 2                        | 20  | POS        |
| 15     | 1                         | 10  | NEG        | 0                        | 100 | NEG        |
| 16     | 2                         | 90  | POS        | 2                        | 10  | POS        |
| 17     | 2                         | 80  | POS        | 2                        | 20  | POS        |
| 18     | 1                         | 5   | NEG        | 1                        | 1   | NEG        |
| 19     | 2                         | 90  | <b>POS</b> | 1                        | 10  | <b>NEG</b> |

Abbreviations: NEG, negative; PD-L1, programmed death ligand-1; POS, positive.
